# Supplementary material
Source: MDPI journal article supplement (https://www.mdpi.com/2073-4395/12/9/2189)
Supplement: s1 [file s1]

**Table S1.** Soil analyses for Campazzo, Pedroni and Preci farms.

| Granulometry                     | Unit of measurement              | Campazzo | Pedroni | Preci  |
|----------------------------------|----------------------------------|----------|---------|--------|
| Sand                             | %                                | 12,8     | 18,3    | 20,9   |
| Silt                             | %                                | 45,0     | 40,7    | 52,8   |
| Clay                             | %                                | 42,1     | 41,0    | 26,2   |
| <b>pH</b>                        |                                  | 7,9      | 7,7     | 7,9    |
| <b>Total limestone</b>           | %                                | 21,7     | 12,0    | 26,8   |
| <b>Active limestone</b>          | %                                | 10,20    | 6,20    | 11,00  |
| <b>Organic matter</b>            | %                                | 2,39     | 3,21    | 1,45   |
| Organic carbon                   | %                                | 1,39     | 1,87    | 0,84   |
| <b>Total nitrogen</b>            | %                                | 0,170    | 0,226   | 0,098  |
| Ratio C/N                        |                                  | 8,2      | 8,2     | 8,6    |
| <b>Cation exchange capacity</b>  | meq*100 g <sup>-1</sup>          | 27,1     | 22,0    | 17,4   |
| <b>Exchangeable calcium</b>      | p.p.m.                           | 6198.0   | 4622.0  | 3012.0 |
| Exchangeable calcium             | meq*100 g <sup>-1</sup>          | 30,93    | 23,07   | 15,03  |
| <b>Exchangeable magnesium</b>    | p.p.m.                           | 163.0    | 375.0   | 150.00 |
| Exchangeable magnesium           | meq*100 g <sup>-1</sup>          | 1,34     | 3,08    | 1,23   |
| % Exchangeable magnesium on CEC  | %                                | 5,0      | 14,0    | 7,1    |
| <b>Exchangeable potassium</b>    | p.p.m.                           | 368.0    | 262.0   | 218.00 |
| Exchangeable potassium           | meq*100 g <sup>-1</sup>          | 0,94     | 0,67    | 0,56   |
| % Exchangeable potassium on CEC  | %                                | 3,5      | 3,0     | 3,2    |
| Ca/Mg                            | ratio in meq*100 g <sup>-1</sup> | 23,1     | 7,5     | 12,2   |
| Ca/K                             | ratio in meq*100 g <sup>-2</sup> | 32,9     | 34,4    | 26,9   |
| Mg/K                             | ratio in meq*100 g <sup>-3</sup> | 1,4      | 4,6     | 2,2    |
| <b>Assimilable phosphorus</b>    | p.p.m.                           | 11.0     | 8.0     | 7.0    |
| Assimilable phosphoric anhydride | p.p.m.                           | 25.0     | 19.0    | 16     |

**Table S2.** One-way ANOVA results of significant differences between farms. The mean and the standard deviation (SD) of each terpene in each farm are reported and distinct letters statistically differ according to Tukey's post-hoc test ( $p < 0.05$ ). Homogeneous subsets are indicated by the same letter.

| Terpene          | (p<)   | Farm | Mean $\pm$ SD (n=9) | * |
|------------------|--------|------|---------------------|---|
| $\alpha$ -pinene | 0.0001 | CA   | 0.64 $\pm$ 0.04     | b |
|                  |        | PE   | 0.57 $\pm$ 0.03     | a |
|                  |        | PR   | 0.63 $\pm$ 0.05     | b |

|                       |        |    |                 |    |
|-----------------------|--------|----|-----------------|----|
| Camphene              | 0.0001 | CA | $0.52 \pm 0.02$ | b  |
|                       |        | PE | $0.32 \pm 0.02$ | a  |
|                       |        | PR | $0.35 \pm 0.03$ | a  |
| Sabinene              | 0.005  | CA | $0.25 \pm 0.04$ | b  |
|                       |        | PE | $0.21 \pm 0.01$ | a  |
|                       |        | PR | $0.23 \pm 0.02$ | ab |
| $\beta$ -pinene       | 0.0001 | CA | $0.3 \pm 0.04$  | a  |
|                       |        | PE | $0.7 \pm 0.04$  | b  |
|                       |        | PR | $0.76 \pm 0.06$ | c  |
| Myrcene               | 0.0001 | CA | $1.15 \pm 0.13$ | a  |
|                       |        | PE | $1.3 \pm 0.09$  | b  |
|                       |        | PR | $1.35 \pm 0.1$  | b  |
| 3-carene              | 0.0001 | CA | $0.28 \pm 0.07$ | c  |
|                       |        | PE | $0.12 \pm 0.01$ | a  |
|                       |        | PR | $0.16 \pm 0.01$ | b  |
| Limonene              | 0.0001 | CA | $5.52 \pm 1.05$ | b  |
|                       |        | PE | $0.53 \pm 0.07$ | a  |
|                       |        | PR | $0.6 \pm 0.08$  | a  |
| 1.8-cineole           | 0.0001 | CA | $4.69 \pm 0.46$ | a  |
|                       |        | PE | $7.53 \pm 0.48$ | b  |
|                       |        | PR | $7.51 \pm 0.73$ | b  |
| <i>cis</i> -ocimene   | 0.0001 | CA | $3.81 \pm 0.72$ | b  |
|                       |        | PE | $1.37 \pm 0.13$ | a  |
|                       |        | PR | $1.55 \pm 0.22$ | a  |
| <i>trans</i> -ocimene | 0.0001 | CA | $1.19 \pm 0.22$ | b  |
|                       |        | PE | $0.6 \pm 0.05$  | a  |
|                       |        | PR | $0.62 \pm 0.06$ | a  |
| $\gamma$ -terpinene   | 0.0001 | CA | $0.19 \pm 0.02$ | b  |
|                       |        | PE | $0.15 \pm 0.01$ | a  |
|                       |        | PR | $0.18 \pm 0.02$ | b  |

|                             |        |    |              |   |
|-----------------------------|--------|----|--------------|---|
| <i>cis</i> linalool oxide   | 0.0001 | CA | 0.21 ± 0.03  | c |
|                             |        | PE | 0.14 ± 0.01  | b |
|                             |        | PR | 0.04 ± 0.06  | a |
| <i>trans</i> linalool oxide | 0.0001 | CA | 0.47 ± 0.02  | b |
|                             |        | PE | 0.32 ± 0.02  | a |
|                             |        | PR | 0.33 ± 0.02  | a |
| Linalool                    | 0.0001 | CA | 47.86 ± 3.35 | b |
|                             |        | PE | 27.47 ± 0.73 | a |
|                             |        | PR | 28.72 ± 1.52 | a |
| Camphor                     | 0.0001 | CA | 3.26 ± 0.39  | a |
|                             |        | PE | 6.82 ± 0.36  | b |
|                             |        | PR | 7.07 ± 0.36  | b |
| Borneol                     | 0.0001 | CA | 11.11 ± 0.81 | b |
|                             |        | PE | 2.46 ± 0.31  | a |
|                             |        | PR | 2.11 ± 0.23  | a |
| Terpinen-4-ol               | 0.0001 | CA | 3.97 ± 0.45  | b |
|                             |        | PE | 1.18 ± 0.07  | a |
|                             |        | PR | 1.2 ± 0.14   | a |
| $\alpha$ -terpineol         | 0.0001 | CA | 0.29 ± 0.03  | a |
|                             |        | PE | 0.61 ± 0.03  | b |
|                             |        | PR | 0.61 ± 0.05  | b |
| Myrtenal                    | 0.0001 | CA | 0.49 ± 0.05  | c |
|                             |        | PE | 0.25 ± 0.02  | b |
|                             |        | PR | 0.19 ± 0.01  | a |
| Pulegone                    | 0.0001 | CA | 0.14 ± 0.01  | b |
|                             |        | PE | 0.15 ± 0.01  | b |
|                             |        | PR | 0.1 ± 0.04   | a |
| Linalyl acetate             | 0.0001 | CA | 5.43 ± 0.54  | a |
|                             |        | PE | 35.37 ± 0.73 | c |
|                             |        | PR | 34.12 ± 1.4  | b |

|                        |        |    |                 |   |
|------------------------|--------|----|-----------------|---|
| Lavandulyl acetate     | 0.0001 | CA | $1.03 \pm 0.15$ | a |
|                        |        | PE | $3.1 \pm 0.09$  | b |
|                        |        | PR | $3.08 \pm 0.14$ | b |
| $\beta$ -caryophyllene | 0.0001 | CA | $0.38 \pm 0.11$ | a |
|                        |        | PE | $1.67 \pm 0.09$ | b |
|                        |        | PR | $1.65 \pm 0.17$ | b |
| $\alpha$ -humulene     | 0.0001 | CA | $1.92 \pm 0.19$ | b |
|                        |        | PE | $1.35 \pm 0.08$ | a |
|                        |        | PR | $1.27 \pm 0.11$ | a |
| Ar curcumene           | 0.0001 | CA | $0.08 \pm 0.05$ | a |
|                        |        | PE | $0.5 \pm 0.04$  | b |
|                        |        | PR | $0.67 \pm 0.09$ | c |
